# Supplementary material
Source: publisher site journal article supplement (https://www.dovepress.com/article/502350)
Supplement: Supplementary file 1 [file get_supplementary_file.php]

**Supplementary Table 1** Systemic treatment regimen in PLEN-HAIC group.

| Immunotherapy (+ Lenvatinib ) | N = 201 (%) |
| --- | --- |
| Camrelizumab | 2 (1.0) |
| Pembolizumab | 5 (2.5) |
| Toripalimab | 12 (5.9) |
| Sintilimab | 73 (36.3) |
| Tislelizumab | 86 (42.9) |
| Durvalumab (PDL1 inhibitor) | 23 (11.4) |

**Supplementary Figure 1** Kaplan–Meier survival curves comparing duration of response among unresectable HCC patients who underwent AT-HAIC versus PLEN-HAIC.

B

A


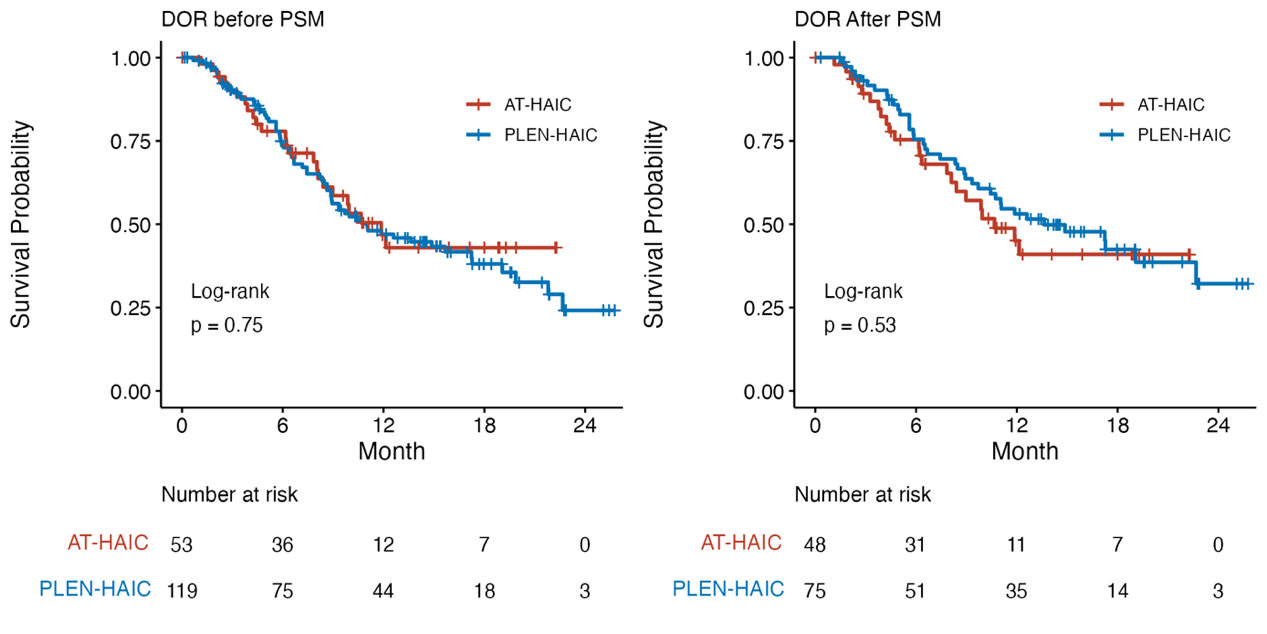


**A** Duration of response before propensity score matching; **B** Duration of response after propensity score matching.

**Supplementary figure 2** Subgroup analysis of PFS and OS in patients receiving Bev or LEN combination regimen before(A, B) and after(C, D) PSM.


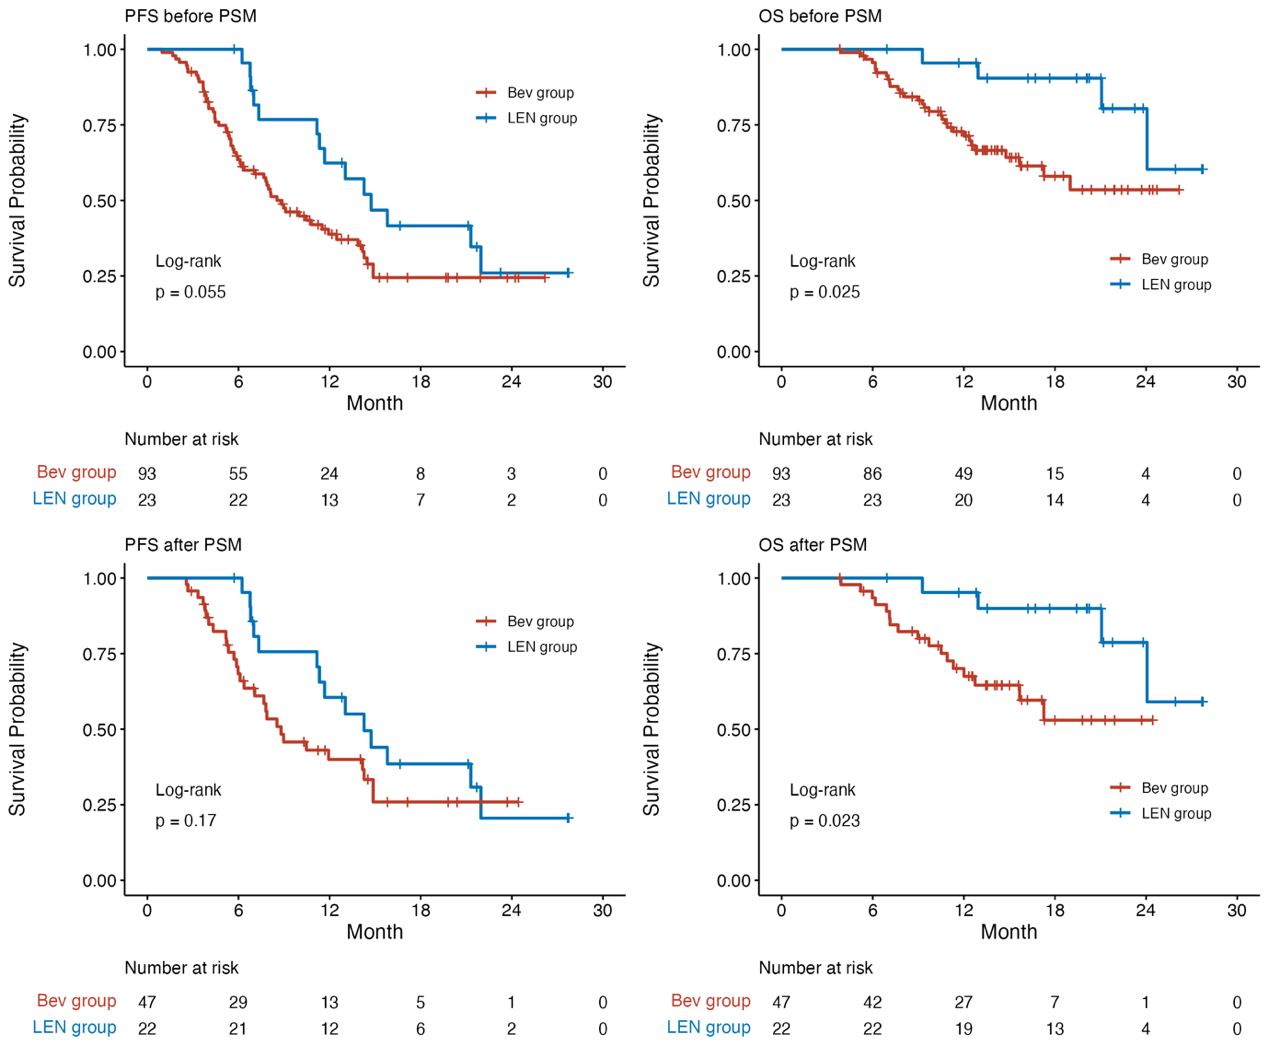


D

C

B

A

Annotation: To compare the efficacy of HAIC combined with either PD(L)1 plus Lenvatinib or Atezolizumab plus Bevacizumab, we analyzed the survival benefit of the LEN group and Bev group. In the LEN group, 23 patients received Durvalumab plus Lenvatinib, while in the Bev group, 93 patients received Atezolizumab plus Bevacizumab. After performing 1:3 PSM with a caliper of 0.2, 22 patients in the LEN group and 47 in the Bev group were identified. The OS was significantly better in the LEN group both before (supp fig.2B, p = 0.025) and after PSM (supp fig. 2D, p = 0.023).
